# Supplementary material for: Stable incorporation of GM-CSF into dissolvable microneedle patch improves skin vaccination against influenza
Source: PubMed Central journal article supplement — J Control Release. Author manuscript; Available in PMC 2018 May 24. (PMC5967648; doi:10.1016/j.jconrel.2018.02.033), 2018-02-26
Supplement: NIHMS961011-supplement.pdf [file NIHMS961011-supplement.pdf]

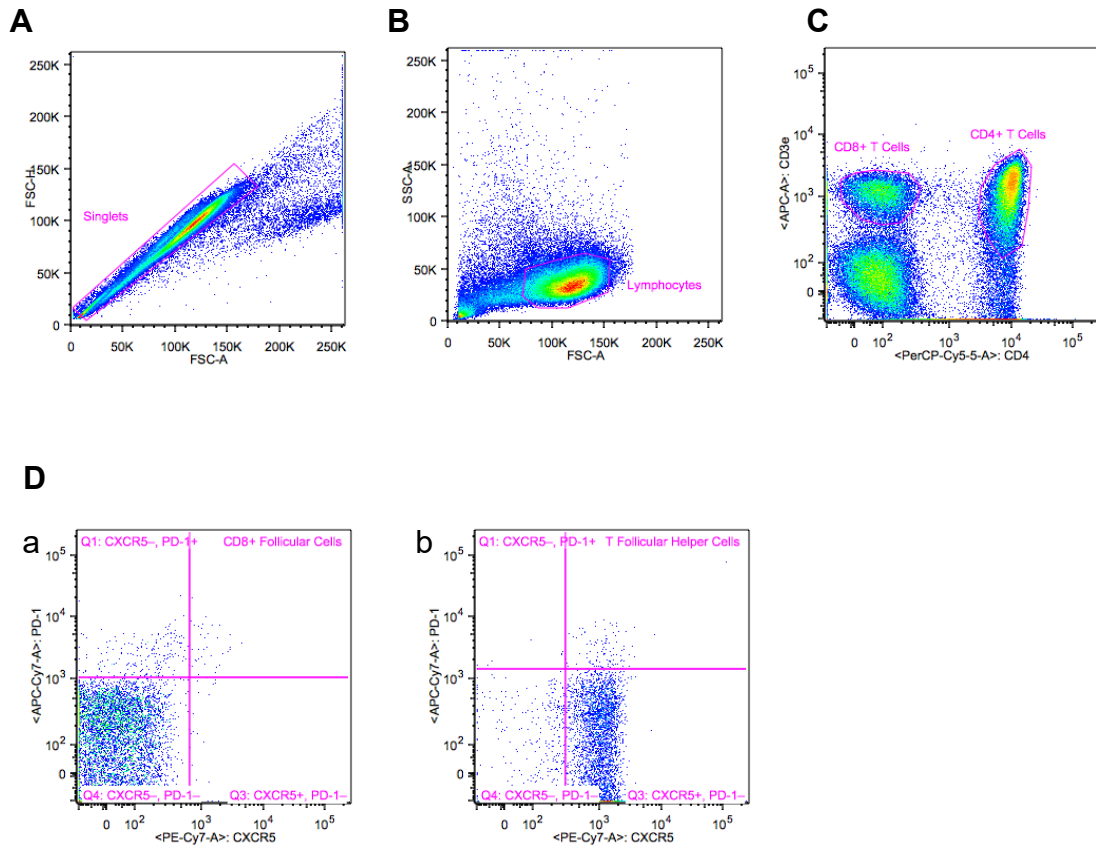

**Suppl. Fig. 1. Gating strategies for flow cytometry.** Lymphocytes were isolated from ILN 14 d.p.v. and analyzed for the frequency of follicular CD8<sup>+</sup> and CD4<sup>+</sup> T cells (Figure 9A and 9B, Suppl. Fig. 3A,B). Samples were acquired on a LSR II flow cytometer (BD Biosciences) and data were analyzed with FlowJo (Tree Star). Cells were gated for singlets (A) first and then lymphocytes (B). CD8<sup>+</sup> follicular T cells were determined to be CD4<sup>-</sup> (PerCP-Cy5.5<sup>-</sup>) CD3 $\epsilon$ <sup>+</sup> (APC<sup>+</sup>) (C) and CXCR5<sup>+</sup> (PE-Cy7<sup>+</sup>) PD-1<sup>+</sup> (APC-Cy7<sup>+</sup>) (Da). CD4<sup>+</sup> follicular T cells were determined to be CD4<sup>+</sup> (PerCP-Cy5.5<sup>+</sup>) CD3 $\epsilon$ <sup>+</sup> (APC<sup>+</sup>) (C) and CXCR5<sup>+</sup> (PE-Cy7<sup>+</sup>) PD-1<sup>+</sup> (APC-Cy7<sup>+</sup>) (Db).

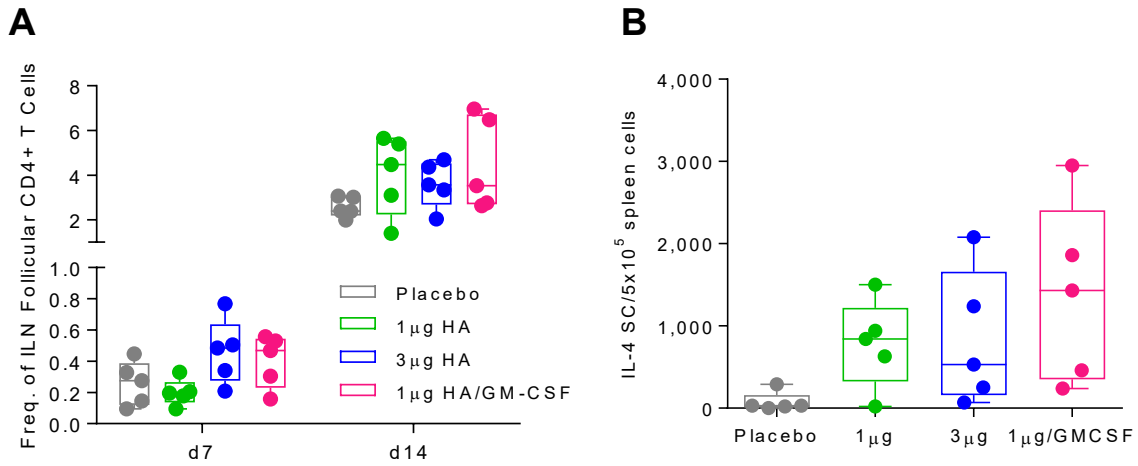

**Suppl. Fig. 2. Activation of T cells in inguinal lymph nodes (ILN) and spleen.** Lymphocytes were isolated from the ILN and the spleen 7 and 14 days post-MN vaccination. Gating strategy for flow cytometry is described in Suppl. Figure 2 (A) CD4+ follicular cells (CD4+CXCR5+PD-1+) were quantified via flow cytometry, and (B) vaccine-specific IL-4-secreting cells were isolated from the spleen at day 7, and enumerated in ELISPOT plates following stimulation with A/Christchurch/16/2010 subunit vaccine. Values are expressed as mean  $\pm$  SEM.

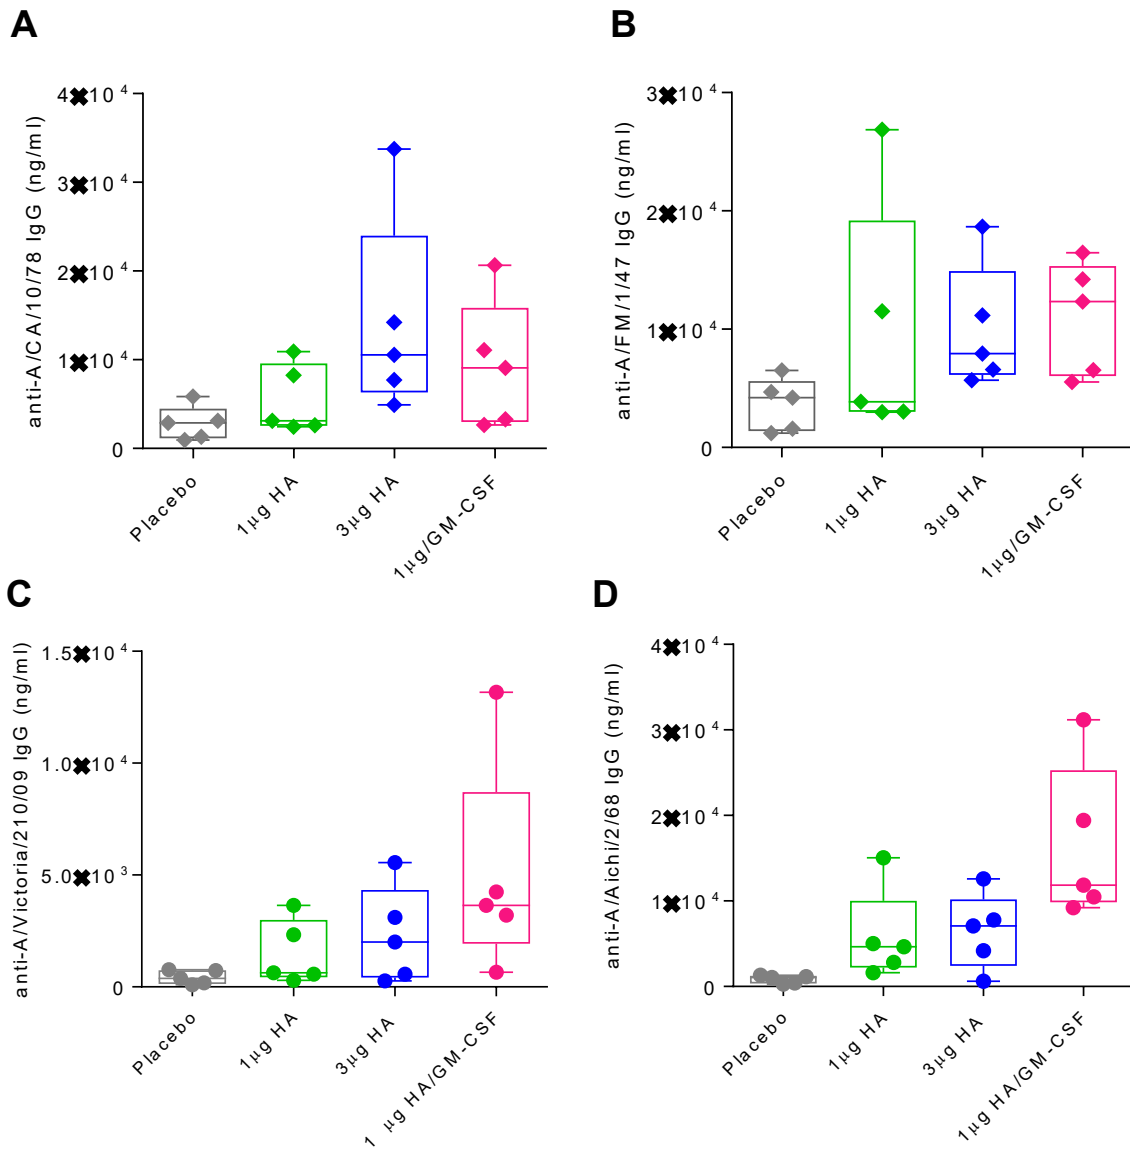

**Suppl. Fig. 3. Cross-reactive antibody titers against H1N1 and H3N2 viruses.** Serum was collected from mice 90 days post-A/Christchurch/16/2010 vaccination with dissolving MN. IgG reactivity with monovalent subunit vaccines for (A) H1N1 A/California/10/1978 ( $p=0.2$ ), (B) H1N1 A/FM/1/1947 ( $p=0.3$ ), (C) H3N2 A/Victoria/210/2009 ( $p=0.055$ ), and (D) H3N2 A/Aichi/2/1968 ( $p=0.055$ .) was measured with ELISA. Statistics performed in Mann-Whitney test for comparison of 1 μg HA/GM-CSF vs. 1 μg HA groups.
